# Supplementary material
Source: Springer Nature journal article supplement (https://www.springermedizin.de/resource/supplementary/13229_2013_70_MOESM3_ESM.pdf/9676102)

a

## EPISODIC MEMORY IN AUTISM

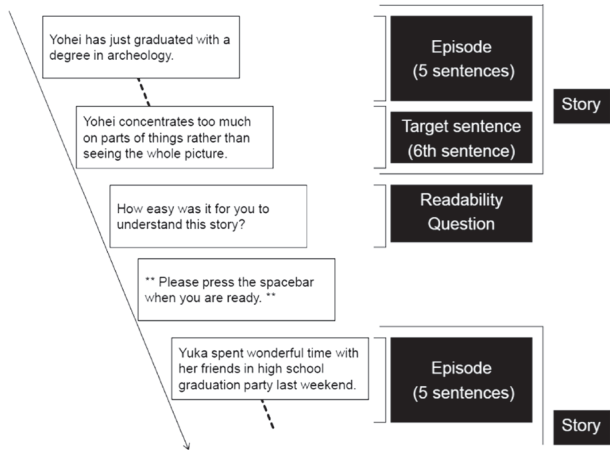

b

## EPISODIC MEMORY IN AUTISM

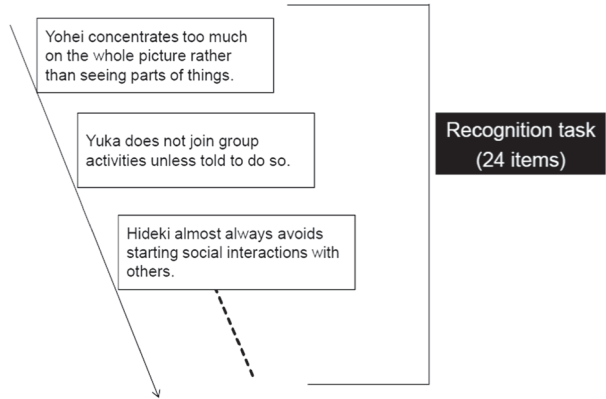

Supplement: MOESM3 [file 9676102]
